# Supplementary material
Source: publisher site journal article supplement (https://www.dovepress.com/article/500214)
Supplement: Supplementary file 1 [file get_supplementary_file.php]

**Supplementary Table 1** Quantitative real-time polymerase chain reaction (RT-qPCR) primers used in the study

| **Gene** | **Primer Sequence (from 5' to 3')** |
| --- | --- |
| Mus-CCL4-Forward | CAGGAGGAGCCACTTCAGGAGAG |
| Mus-CCL4-Reverse | AAATCTGAACGTGAGGAGCAAGGAC |
| Mus-FCGR2B-Forward | TGCTAAATCTTGCTGCTGGGACTC |
| Mus-FCGR2B-Reverse | GTCAGTGTCACCGTGTCTTCCTTG |
